# Supplementary material for: A comprehensive method for the quantification of medication error probability based on fuzzy SLIM
Source: PubMed Central journal article supplement (PMC8880918; doi:10.1371/journal.pone.0264303), 2022-02-25
Supplement: pone.0264303.s001.pdf [file pone.0264303.s001.pdf]

### Weighting of PSFs

| Expert          | personal factors | job-related factors | organization-related factors |
|-----------------|------------------|---------------------|------------------------------|
| E <sub>1</sub>  | (0.3,0.5,0.7)    | (0.5,0.7,0.9)       | (0.5,0.7,0.9)                |
| E <sub>2</sub>  | (0.5,0.7,0.9)    | (0.7,0.85,1)        | (0.7,0.85,1)                 |
| E <sub>3</sub>  | (0.7,0.85,1)     | (0.7,0.85,1)        | (0.7,0.85,1)                 |
| E <sub>4</sub>  | (0.7,0.85,1)     | (0.3,0.5,0.7)       | (0.7,0.85,1)                 |
| E <sub>5</sub>  | (0.5,0.7,0.9)    | (0.3,0.5,0.7)       | (0.3,0.5,0.7)                |
| E <sub>6</sub>  | (0.7,0.85,1)     | (0.7,0.85,1)        | (0.5,0.7,0.9)                |
| E <sub>7</sub>  | (0.5,0.7,0.9)    | (0.3,0.5,0.7)       | (0.1,0.3,0.5)                |
| E <sub>8</sub>  | (0.5,0.7,0.9)    | (0.3,0.5,0.7)       | (0.3,0.5,0.7)                |
| E <sub>9</sub>  | (0.7,0.85,1)     | (0.3,0.5,0.7)       | (0.5,0.7,0.9)                |
| E <sub>10</sub> | (0.7,0.85,1)     | (0.5,0.7,0.9)       | (0.3,0.5,0.7)                |

### Weighting of subPSFs : the pairwise comparison matrix

| E <sub>1</sub>                   |               |               |                          |                 |                                  |                |
|----------------------------------|---------------|---------------|--------------------------|-----------------|----------------------------------|----------------|
| Personal                         | Knowledge     | Experience    | Fatigue                  | Physical health | Task Time (Circadian Rhythm)     |                |
| Knowledge                        | (1,1,1)       | (2/5,1/2,2/3) | (1,1,1)                  | (1,1,1)         | (2,5/2,3)                        |                |
| Experience                       | (3/2,2,5/2)   | (1,1,1)       | (1,3/2,2)                | (1,3/2,2)       | (1,3/2,2)                        |                |
| Fatigue                          | (1,1,1)       | (1/2,2/3,1)   | (1,1,1)                  | (1,1,1)         | (1,1,1)                          |                |
| Physical health                  | (1,1,1)       | (1/2,2/3,1)   | (1,1,1)                  | (1,1,1)         | (1,1,1)                          |                |
| Task Time (Circadian Rhythm)     | (1/3,2/5,1/2) | (1/2,2/3,1)   | (1,1,1)                  | (1,1,1)         | (1,1,1)                          |                |
| Job                              | Workload      | Procedures    | The physical environment | Housekeeping    | Transparency of responsibilities | Time available |
| Workload                         | (1,1,1)       | (1/2,2/3,1)   | (1/2,2/3,1)              | (1,1,1)         | (2/5,1/2,2/3)                    | (1,1,1)        |
| Procedures                       | (1,3/2,2)     | (1,1,1)       | (1,1,1)                  | (1,3/2,2)       | (1,1,1)                          | (1,3/2,2)      |
| The physical environment         | (1,3/2,2)     | (1,1,1)       | (1,1,1)                  | (1,1,1)         | (1,1,1)                          | (1,1,1)        |
| Housekeeping                     | (1,1,1)       | (1/2,2/3,1)   | (1,1,1)                  | (1,1,1)         | (1/2,2/3,1)                      | (1,1,1)        |
| Transparency of responsibilities | (3/2,2,5/2)   | (1,1,1)       | (1,1,1)                  | (1,3/2,2)       | (1,1,1)                          | (1,3/2,2)      |

|                             |                        |                |             |                             |                   |                          |
|-----------------------------|------------------------|----------------|-------------|-----------------------------|-------------------|--------------------------|
| Time available              | (1,1,1)                | (1/2,2/3,1)    | (1,1,1)     | (1,1,1)                     | (1/2,2/3,1)       | (1,1,1)                  |
| <b>Organization</b>         | Patient safety climate | Safety culture | Training    | Communication between staff | Supervising staff | Error Management Culture |
| Patient safety climate      | (1,1,1)                | (1,1,1)        | (3/2,2,5/2) | (1,1,1)                     | (1,3/2,2)         | (1/2,2/3,1)              |
| Safety culture              | (1,1,1)                | (1,1,1)        | (1,3/2,2)   | (1,1,1)                     | (1,3/2,2)         | (1/2,2/3,1)              |
| Training                    | (2/5,1/2,2/3)          | (1/2,2/3,1)    | (1,1,1)     | (1/2,2/3,1)                 | (1/2,2/3,1)       | (2/5,1/2,2/3)            |
| Communication between staff | (1,1,1)                | (1,1,1)        | (1,3/2,2)   | (1,1,1)                     | (1,3/2,2)         | (1/2,2/3,1)              |
| Supervising staff           | (1/2,2/3,1)            | (1/2,2/3,1)    | (1,3/2,2)   | (1/2,2/3,1)                 | (1,1,1)           | (2/5,1/2,2/3)            |
| Error Management Culture    | (1,3/2,2)              | (1,3/2,2)      | (3/2,2,5/2) | (1,3/2,2)                   | (3/2,2,5/2)       | (1,1,1)                  |

| <b>E<sub>2</sub></b>         |               |               |                          |                 |                                  |                |
|------------------------------|---------------|---------------|--------------------------|-----------------|----------------------------------|----------------|
| <b>Personal</b>              | Knowledge     | Experience    | Fatigue                  | Physical health | Task Time (Circadian Rhythm)     |                |
| Knowledge                    | (1,1,1)       | (3/2,2,5/2)   | (1,1,1)                  | (1,1,1)         | (1,1,1)                          |                |
| Experience                   | (2/5,1/2,2/3) | (1,1,1)       | (3/2,2,5/2)              | (1,1,1)         | (1,1,1)                          |                |
| Fatigue                      | (1,1,1)       | (2/5,1/2,2/3) | (1,1,1)                  | (3/2,2,5/2)     | (1,1,1)                          |                |
| Physical health              | (1,1,1)       | (1/2,2/3,1)   | (2/5,1/2,2/3)            | (1,1,1)         | (1,1,1)                          |                |
| Task Time (Circadian Rhythm) | (1,1,1)       | (1,1,1)       | (1,1,1)                  | (1,1,1)         | (1,1,1)                          |                |
| <b>Job</b>                   | Workload      | Procedures    | The physical environment | Housekeeping    | Transparency of responsibilities | Time available |
| Workload                     | (1,1,1)       | (1,3/2,2)     | (1,3/2,2)                | (1,1,1)         | (1,1,1)                          | (1,1,1)        |
| Procedures                   | (1/2,2/3,1)   | (1,1,1)       | (1,3/2,2)                | (1,3/2,2)       | (1,3/2,2)                        | (1,3/2,2)      |

|                                  |                        |                |             |                             |                   |                          |
|----------------------------------|------------------------|----------------|-------------|-----------------------------|-------------------|--------------------------|
| The physical environment         | (1/2,2/3,1)            | (1/2,2/3,1)    | (1,1,1)     | (1,3/2,2)                   | (1,1,1)           | (1,1,1)                  |
| Housekeeping                     | (1,1,1)                | (1/2,2/3,1)    | (1/2,2/3,1) | (1,1,1)                     | (1,1,1)           | (1,1,1)                  |
| Transparency of responsibilities | (1,1,1)                | (1/2,2/3,1)    | (1,1,1)     | (1,1,1)                     | (1,1,1)           | (3/2,2,5/2)              |
| Time available                   | (1,1,1)                | (1/2,2/3,1)    | (1,1,1)     | (1,1,1)                     | (2/5,1/2,2/3)     | (1,1,1)                  |
| <b>Organization</b>              | Patient safety climate | Safety culture | Training    | Communication between staff | Supervising staff | Error Management Culture |
| Patient safety climate           | (1,1,1)                | (1,1,1)        | (1,1,1)     | (1,1,1)                     | (1,1,1)           | (1,1,1)                  |
| Safety culture                   | (1,1,1)                | (1,1,1)        | (3/2,2,5/2) | (1,1,1)                     | (1,3/2,2)         | (1,1,1)                  |
| Training                         | (1,1,1)                | (2/5,1/2,2/3)  | (1,1,1)     | (1,1,1)                     | (1,1,1)           | (1,3/2,2)                |
| Communication between staff      | (1,1,1)                | (1,1,1)        | (1,1,1)     | (1,1,1)                     | (1,3/2,2)         | (1,3/2,2)                |
| Supervising staff                | (1,1,1)                | (1/2,2/3,1)    | (1,1,1)     | (1/2,2/3,1)                 | (1,1,1)           | (1,1,1)                  |
| Error Management Culture         | (1,1,1)                | (1,1,1)        | (1/2,2/3,1) | (1/2,2/3,1)                 | (1,1,1)           | (1,1,1)                  |

| <b>E<sub>3</sub></b>         |             |             |               |                 |                              |  |
|------------------------------|-------------|-------------|---------------|-----------------|------------------------------|--|
| <b>Personal</b>              | Knowledge   | Experience  | Fatigue       | Physical health | Task Time (Circadian Rhythm) |  |
| Knowledge                    | (1,1,1)     | (1,1,1)     | (2/7,1/3,2/5) | (1,3/2,2)       | (1/3,2/5,1/2)                |  |
| Experience                   | (1,1,1)     | (1,1,1)     | (2/7,1/3,2/5) | (1,3/2,2)       | (1/2,2/3,1)                  |  |
| Fatigue                      | (5/2,3,7/2) | (5/2,3,7/2) | (1,1,1)       | (5/2,3,7/2)     | (1,3/2,2)                    |  |
| Physical health              | (1/2,2/3,1) | (1/2,2/3,1) | (2/7,1/3,2/5) | (1,1,1)         | (1/2,2/3,1)                  |  |
| Task Time (Circadian Rhythm) | (2,5/2,3)   | (1,3/2,2)   | (1/2,2/3,1)   | (1,3/2,2)       | (1,1,1)                      |  |

| <b>Job</b>                       | Workload               | Procedures     | The physical environment | Housekeeping                | Transparency of responsibilities | Time available           |
|----------------------------------|------------------------|----------------|--------------------------|-----------------------------|----------------------------------|--------------------------|
| Workload                         | (1,1,1)                | (2,5/2,3)      | (2,5/2,3)                | (2,5/2,3)                   | (2,5/2,3)                        | (1,3/2,2)                |
| Procedures                       | (1/3,2/5,1/2)          | (1,1,1)        | (1/2,2/3,1)              | (1/2,2/3,1)                 | (1/2,2/3,1)                      | (1/2,2/3,1)              |
| The physical environment         | (1/3,2/5,1/2)          | (1,3/2,2)      | (1,1,1)                  | (1,3/2,2)                   | (1,3/2,2)                        | (1,1,1)                  |
| Housekeeping                     | (1/3,2/5,1/2)          | (1,3/2,2)      | (1/2,2/3,1)              | (1,1,1)                     | (1/2,2/3,1)                      | (1/2,2/3,1)              |
| Transparency of responsibilities | (1/3,2/5,1/2)          | (1,3/2,2)      | (1/2,2/3,1)              | (1,3/2,2)                   | (1,1,1)                          | (1,1,1)                  |
| Time available                   | (1/2,2/3,1)            | (1,3/2,2)      | (1,1,1)                  | (1,3/2,2)                   | (1,1,1)                          | (1,1,1)                  |
| <b>Organization</b>              | Patient safety climate | Safety culture | Training                 | Communication between staff | Supervising staff                | Error Management Culture |
| Patient safety climate           | (1,1,1)                | (1,3/2,2)      | (1,3/2,2)                | (1/2,2/3,1)                 | (1,3/2,2)                        | (2/7,1/3,2/5)            |
| Safety culture                   | (1/2,2/3,1)            | (1,1,1)        | (2,5/2,3)                | (1/2,2/3,1)                 | (1,3/2,2)                        | (2/7,1/3,2/5)            |
| Training                         | (1/2,2/3,1)            | (1/3,2/5,1/2)  | (1,1,1)                  | (1/2,2/3,1)                 | (1,1,1)                          | (2/7,1/3,2/5)            |
| Communication between staff      | (1,3/2,2)              | (1,3/2,2)      | (1,3/2,2)                | (1,1,1)                     | (1,3/2,2)                        | (2/7,1/3,2/5)            |
| Supervising staff                | (1/2,2/3,1)            | (1/2,2/3,1)    | (1,1,1)                  | (1/2,2/3,1)                 | (1,1,1)                          | (1/3,2/5,1/2)            |
| Error Management Culture         | (5/2,3,7/2)            | (5/2,3,7/2)    | (5/2,3,7/2)              | (5/2,3,7/2)                 | (2,5/2,3)                        | (1,1,1)                  |

| <b>E<sub>4</sub></b> |           |             |               |                 |                              |  |
|----------------------|-----------|-------------|---------------|-----------------|------------------------------|--|
| <b>Personal</b>      | Knowledge | Experience  | Fatigue       | Physical health | Task Time (Circadian Rhythm) |  |
| Knowledge            | (1,1,1)   | (3/2,2,5/2) | (2/7,1/3,2/5) | (2/5,1/2,2/3)   | (1/2,2/3,1)                  |  |

|                                  |                        |                |                          |                             |                                  |                          |
|----------------------------------|------------------------|----------------|--------------------------|-----------------------------|----------------------------------|--------------------------|
| Experience                       | (2/5,1/2,2/3)          | (1,1,1)        | (2/7,1/3,2/5)            | (2/5,1/2,2/3)               | (1/2,2/3,1)                      |                          |
| Fatigue                          | (5/2,3,7/2)            | (5/2,3,7/2)    | (1,1,1)                  | (1,1,1)                     | (1,1,1)                          |                          |
| Physical health                  | (3/2,2,5/2)            | (3/2,2,5/2)    | (1,1,1)                  | (1,1,1)                     | (1,1,1)                          |                          |
| Task Time (Circadian Rhythm)     | (1,3/2,2)              | (1,3/2,2)      | (1,1,1)                  | (1,1,1)                     | (1,1,1)                          |                          |
| <b>Job</b>                       | Workload               | Procedures     | The physical environment | Housekeeping                | Transparency of responsibilities | Time available           |
| Workload                         | (1,1,1)                | (1,3/2,2)      | (1,3/2,2)                | (1,1,1)                     | (1,1,1)                          | (1,1,1)                  |
| Procedures                       | (1/2,2/3,1)            | (1,1,1)        | (2,5/2,3)                | (1,1,1)                     | (1,1,1)                          | (1,1,1)                  |
| The physical environment         | (1/2,2/3,1)            | (1/3,2/5,1/2)  | (1,1,1)                  | (2/5,1/2,2/3)               | (1/3,2/5,1/2)                    | (2/5,1/2,2/3)            |
| Housekeeping                     | (1,1,1)                | (1,1,1)        | (3/2,2,5/2)              | (1,1,1)                     | (1,1,1)                          | (1,1,1)                  |
| Transparency of responsibilities | (1,1,1)                | (1,1,1)        | (2,5/2,3)                | (1,1,1)                     | (1,1,1)                          | (1,3/2,2)                |
| Time available                   | (1,1,1)                | (1,1,1)        | (3/2,2,5/2)              | (1,1,1)                     | (1/2,2/3,1)                      | (1,1,1)                  |
| <b>Organization</b>              | Patient safety climate | Safety culture | Training                 | Communication between staff | Supervising staff                | Error Management Culture |
| Patient safety climate           | (1,1,1)                | (1/3,2/5,1/2)  | (3/2,2,5/2)              | (3/2,2,5/2)                 | (3/2,2,5/2)                      | (1,1,1)                  |
| Safety culture                   | (2,5/2,3)              | (1,1,1)        | (2,5/2,3)                | (2,5/2,3)                   | (5/2,3,7/2)                      | (3/2,2,5/2)              |
| Training                         | (2/5,1/2,2/3)          | (1/3,2/5,1/2)  | (1,1,1)                  | (3/2,2,5/2)                 | (3/2,2,5/2)                      | (1,1,1)                  |
| Communication between staff      | (2/5,1/2,2/3)          | (1/3,2/5,1/2)  | (2/5,1/2,2/3)            | (1,1,1)                     | (1,1,1)                          | (2/5,1/2,2/3)            |
| Supervising staff                | (2/5,1/2,2/3)          | (2/7,1/3,2/5)  | (2/5,1/2,2/3)            | (1,1,1)                     | (1,1,1)                          | (2/5,1/2,2/3)            |
| Error Management Culture         | (1,1,1)                | (2/5,1/2,2/3)  | (1,1,1)                  | (3/2,2,5/2)                 | (3/2,2,5/2)                      | (1,1,1)                  |

| <b>E<sub>5</sub></b>             |                        |                |                          |                             |                                  |                          |
|----------------------------------|------------------------|----------------|--------------------------|-----------------------------|----------------------------------|--------------------------|
| <b>Personal</b>                  | Knowledge              | Experience     | Fatigue                  | Physical health             | Task Time (Circadian Rhythm)     |                          |
| Knowledge                        | (1,1,1)                | (1,1,1)        | (5/2,3,7/2)              | (1,3/2,2)                   | (3/2,2,5/2)                      |                          |
| Experience                       | (1,1,1)                | (1,1,1)        | (5/2,3,7/2)              | (3/2,2,5/2)                 | (2,5/2,3)                        |                          |
| Fatigue                          | (2/7,1/3,2/5)          | (2/7,1/3,2/5)  | (1,1,1)                  | (1/3,2/5,1/2)               | (2,5/2,3)                        |                          |
| Physical health                  | (1/2,2/3,1)            | (2/5,1/2,2/3)  | (2,5/2,3)                | (1,1,1)                     | (3/2,2,5/2)                      |                          |
| Task Time (Circadian Rhythm)     | (2/5,1/2,2/3)          | (1/3,2/5,1/2)  | (1/3,2/5,1/2)            | (2/5,1/2,2/3)               | (1,1,1)                          |                          |
| <b>Job</b>                       | Workload               | Procedures     | The physical environment | Housekeeping                | Transparency of responsibilities | Time available           |
| Workload                         | (1,1,1)                | (2,5/2,3)      | (2,5/2,3)                | (2,5/2,3)                   | (3/2,2,5/2)                      | (3/2,2,5/2)              |
| Procedures                       | (1/3,2/5,1/2)          | (1,1,1)        | (1,3/2,2)                | (1/2,2/3,1)                 | (1/2,2/3,1)                      | (2/5,1/2,2/3)            |
| The physical environment         | (1/3,2/5,1/2)          | (1/2,2/3,1)    | (1,1,1)                  | (2/5,1/2,2/3)               | (1/2,2/3,1)                      | (2/5,1/2,2/3)            |
| Housekeeping                     | (1/3,2/5,1/2)          | (1,3/2,2)      | (3/2,2,5/2)              | (1,1,1)                     | (3/2,2,5/2)                      | (2/5,1/2,2/3)            |
| Transparency of responsibilities | (2/5,1/2,2/3)          | (1,3/2,2)      | (1,3/2,2)                | (2/5,1/2,2/3)               | (1,1,1)                          | (2/5,1/2,2/3)            |
| Time available                   | (2/5,1/2,2/3)          | (3/2,2,5/2)    | (3/2,2,5/2)              | (3/2,2,5/2)                 | (3/2,2,5/2)                      | (1,1,1)                  |
| <b>Organization</b>              | Patient safety climate | Safety culture | Training                 | Communication between staff | Supervising staff                | Error Management Culture |
| Patient safety climate           | (1,1,1)                | (2/5,1/2,2/3)  | (1/2,2/3,1)              | (1,3/2,2)                   | (3/2,2,5/2)                      | (3/2,2,5/2)              |
| Safety culture                   | (3/2,2,5/2)            | (1,1,1)        | (3/2,2,5/2)              | (3/2,2,5/2)                 | (3/2,2,5/2)                      | (3/2,2,5/2)              |
| Training                         | (1,3/2,2)              | (2/5,1/2,2/3)  | (1,1,1)                  | (3/2,2,5/2)                 | (3/2,2,5/2)                      | (3/2,2,5/2)              |
| Communication between staff      | (1/2,2/3,1)            | (2/5,1/2,2/3)  | (2/5,1/2,2/3)            | (1,1,1)                     | (1/2,2/3,1)                      | (2/5,1/2,2/3)            |

|                          |               |               |               |             |           |             |
|--------------------------|---------------|---------------|---------------|-------------|-----------|-------------|
| Supervising staff        | (2/5,1/2,2/3) | (2/5,1/2,2/3) | (2/5,1/2,2/3) | (1,3/2,2)   | (1,1,1)   | (1/2,2/3,1) |
| Error Management Culture | (2/5,1/2,2/3) | (2/5,1/2,2/3) | (2/5,1/2,2/3) | (3/2,2,5/2) | (1,3/2,2) | (1,1,1)     |

| <b>E<sub>6</sub></b>             |                        |                |                          |                             |                                  |                          |
|----------------------------------|------------------------|----------------|--------------------------|-----------------------------|----------------------------------|--------------------------|
| <b>Personal</b>                  | Knowledge              | Experience     | Fatigue                  | Physical health             | Task Time (Circadian Rhythm)     |                          |
| Knowledge                        | (1,1,1)                | (1/3,2/5,1/2)  | (2/7,1/3,2/5)            | (3/2,2,5/2)                 | (1/3,2/5,1/2)                    |                          |
| Experience                       | (2,5/2,3)              | (1,1,1)        | (1/3,2/5,1/2)            | (3/2,2,5/2)                 | (2/5,1/2,2/3)                    |                          |
| Fatigue                          | (5/2,3,7/2)            | (2,5/2,3)      | (1,1,1)                  | (3/2,2,5/2)                 | (1,1,1)                          |                          |
| Physical health                  | (2/5,1/2,2/3)          | (2/5,1/2,2/3)  | (2/5,1/2,2/3)            | (1,1,1)                     | (1/2,2/3,1)                      |                          |
| Task Time (Circadian Rhythm)     | (2,5/2,3)              | (3/2,2,5/2)    | (1,1,1)                  | (1,3/2,2)                   | (1,1,1)                          |                          |
| <b>Job</b>                       | Workload               | Procedures     | The physical environment | Housekeeping                | Transparency of responsibilities | Time available           |
| Workload                         | (1,1,1)                | (1,3/2,2)      | (1,3/2,2)                | (1,3/2,2)                   | (1,1,1)                          | (1/2,2/3,1)              |
| Procedures                       | (1/2,2/3,1)            | (1,1,1)        | (1,1,1)                  | (1,3/2,2)                   | (1,3/2,2)                        | (2/5,1/2,2/3)            |
| The physical environment         | (1/2,2/3,1)            | (1,1,1)        | (1,1,1)                  | (1,1,1)                     | (2/5,1/2,2/3)                    | (2/5,1/2,2/3)            |
| Housekeeping                     | (1/2,2/3,1)            | (1/2,2/3,1)    | (1,1,1)                  | (1,1,1)                     | (1,3/2,2)                        | (1/2,2/3,1)              |
| Transparency of responsibilities | (1,1,1)                | (1/2,2/3,1)    | (3/2,2,5/2)              | (1/2,2/3,1)                 | (1,1,1)                          | (1/2,2/3,1)              |
| Time available                   | (1,3/2,2)              | (3/2,2,5/2)    | (3/2,2,5/2)              | (1,3/2,2)                   | (1,3/2,2)                        | (1,1,1)                  |
| <b>Organization</b>              | Patient safety climate | Safety culture | Training                 | Communication between staff | Supervising staff                | Error Management Culture |
| Patient safety climate           | (1,1,1)                | (1/2,2/3,1)    | (2/5,1/2,2/3)            | (2/5,1/2,2/3)               | (1/2,2/3,1)                      | (2/7,1/3,2/5)            |

|                             |             |           |               |             |             |             |
|-----------------------------|-------------|-----------|---------------|-------------|-------------|-------------|
| Safety culture              | (1,3/2,2)   | (1,1,1)   | (1/2,2/3,1)   | (1/2,2/3,1) | (1/2,2/3,1) | (1/2,2/3,1) |
| Training                    | (3/2,2,5/2) | (1,3/2,2) | (1,1,1)       | (5/2,3,7/2) | (1,1,1)     | (1,1,1)     |
| Communication between staff | (3/2,2,5/2) | (1,3/2,2) | (2/7,1/3,2/5) | (1,1,1)     | (1,1,1)     | (1,1,1)     |
| Supervising staff           | (1,3/2,2)   | (1,3/2,2) | (1,1,1)       | (1,1,1)     | (1,1,1)     | (1,1,1)     |
| Error Management Culture    | (5/2,3,7/2) | (1,3/2,2) | (1,1,1)       | (1,1,1)     | (1,1,1)     | (1,1,1)     |

| <b>E<sub>7</sub></b>             |               |               |                          |                 |                                  |                |
|----------------------------------|---------------|---------------|--------------------------|-----------------|----------------------------------|----------------|
| <b>Personal</b>                  | Knowledge     | Experience    | Fatigue                  | Physical health | Task Time (Circadian Rhythm)     |                |
| Knowledge                        | (1,1,1)       | (1/3,2/5,1/2) | (1/2,2/3,1)              | (2,5/2,3)       | (2/7,1/3,2/5)                    |                |
| Experience                       | (2,5/2,3)     | (1,1,1)       | (1/2,2/3,1)              | (1,3/2,2)       | (2/7,1/3,2/5)                    |                |
| Fatigue                          | (1,3/2,2)     | (1,3/2,2)     | (1,1,1)                  | (3/2,2,5/2)     | (1,3/2,2)                        |                |
| Physical health                  | (1/3,2/5,1/2) | (1/2,2/3,1)   | (2/5,1/2,2/3)            | (1,1,1)         | (1/3,2/5,1/2)                    |                |
| Task Time (Circadian Rhythm)     | (5/2,3,7/2)   | (5/2,3,7/2)   | (1/2,2/3,1)              | (2,5/2,3)       | (1,1,1)                          |                |
| <b>Job</b>                       | Workload      | Procedures    | The physical environment | Housekeeping    | Transparency of responsibilities | Time available |
| Workload                         | (1,1,1)       | (1,3/2,2)     | (1,1,1)                  | (1,3/2,2)       | (3/2,2,5/2)                      | (1,1,1)        |
| Procedures                       | (1/2,2/3,1)   | (1,1,1)       | (1,1,1)                  | (1,1,1)         | (1,1,1)                          | (2/5,1/2,2/3)  |
| The physical environment         | (1,1,1)       | (1,1,1)       | (1,1,1)                  | (1,1,1)         | (1,3/2,2)                        | (2/5,1/2,2/3)  |
| Housekeeping                     | (1/2,2/3,1)   | (1,1,1)       | (1,1,1)                  | (1,1,1)         | (1,1,1)                          | (2/5,1/2,2/3)  |
| Transparency of responsibilities | (2/5,1/2,2/3) | (1,1,1)       | (1/2,2/3,1)              | (1,1,1)         | (1,1,1)                          | (1/3,2/5,1/2)  |



|                             |                        |                |               |                             |                   |                          |
|-----------------------------|------------------------|----------------|---------------|-----------------------------|-------------------|--------------------------|
| Time available              | (1,1,1)                | (3/2,2,5/2)    | (3/2,2,5/2)   | (3/2,2,5/2)                 | (2,5/2,3)         | (1,1,1)                  |
| <b>Organization</b>         | Patient safety climate | Safety culture | Training      | Communication between staff | Supervising staff | Error Management Culture |
| Patient safety climate      | (1,1,1)                | (1,1,1)        | (1/3,2/5,1/2) | (2/5,1/2,2/3)               | (2/5,1/2,2/3)     | (2/5,1/2,2/3)            |
| Safety culture              | (1,1,1)                | (1,1,1)        | (2/5,1/2,2/3) | (2/5,1/2,2/3)               | (2/5,1/2,2/3)     | (1,1,1)                  |
| Training                    | (2,5/2,3)              | (3/2,2,5/2)    | (1,1,1)       | (3/2,2,5/2)                 | (1,3/2,2)         | (2,5/2,3)                |
| Communication between staff | (3/2,2,5/2)            | (3/2,2,5/2)    | (2/5,1/2,2/3) | (1,1,1)                     | (1,1,1)           | (1,1,1)                  |
| Supervising staff           | (3/2,2,5/2)            | (3/2,2,5/2)    | (1/2,2/3,1)   | (1,1,1)                     | (1,1,1)           | (1,3/2,2)                |
| Error Management Culture    | (3/2,2,5/2)            | (1,1,1)        | (1/3,2/5,1/2) | (1,1,1)                     | (1/2,2/3,1)       | (1,1,1)                  |

| <b>E<sub>8</sub></b>         |               |               |                          |                 |                                  |                |
|------------------------------|---------------|---------------|--------------------------|-----------------|----------------------------------|----------------|
| <b>Personal</b>              | Knowledge     | Experience    | Fatigue                  | Physical health | Task Time (Circadian Rhythm)     |                |
| Knowledge                    | (1,1,1)       | (2,5/2,3)     | (1/2,2/3,1)              | (2,5/2,3)       | (1,1,1)                          |                |
| Experience                   | (1/3,2/5,1/2) | (1,1,1)       | (2/5,1/2,2/3)            | (3/2,2,5/2)     | (3/2,2,5/2)                      |                |
| Fatigue                      | (1,3/2,2)     | (3/2,2,5/2)   | (1,1,1)                  | (2,5/2,3)       | (2,5/2,3)                        |                |
| Physical health              | (1/3,2/5,1/2) | (2/5,1/2,2/3) | (1/3,2/5,1/2)            | (1,1,1)         | (1/2,2/3,1)                      |                |
| Task Time (Circadian Rhythm) | (1,1,1)       | (2/5,1/2,2/3) | (1/3,2/5,1/2)            | (1,3/2,2)       | (1,1,1)                          |                |
| <b>Job</b>                   | Workload      | Procedures    | The physical environment | Housekeeping    | Transparency of responsibilities | Time available |
| Workload                     | (1,1,1)       | (2,5/2,3)     | (3/2,2,5/2)              | (1,1,1)         | (1,3/2,2)                        | (1/3,2/5,1/2)  |
| Procedures                   | (1/3,2/5,1/2) | (1,1,1)       | (3/2,2,5/2)              | (1/2,2/3,1)     | (3/2,2,5/2)                      | (1,3/2,2)      |

|                                  |                        |                |               |                             |                   |                          |
|----------------------------------|------------------------|----------------|---------------|-----------------------------|-------------------|--------------------------|
| The physical environment         | (2/5,1/2,2/3)          | (2/5,1/2,2/3)  | (1,1,1)       | (2/5,1/2,2/3)               | (3/2,2,5/2)       | (1,1,1)                  |
| Housekeeping                     | (1,1,1)                | (1,3/2,2)      | (3/2,2,5/2)   | (1,1,1)                     | (3/2,2,5/2)       | (3/2,2,5/2)              |
| Transparency of responsibilities | (1/2,2/3,1)            | (2/5,1/2,2/3)  | (2/5,1/2,2/3) | (2/5,1/2,2/3)               | (1,1,1)           | (1/2,2/3,1)              |
| Time available                   | (2,5/2,3)              | (1/2,2/3,1)    | (1,1,1)       | (2/5,1/2,2/3)               | (1,3/2,2)         | (1,1,1)                  |
| <b>Organization</b>              | Patient safety climate | Safety culture | Training      | Communication between staff | Supervising staff | Error Management Culture |
| Patient safety climate           | (1,1,1)                | (2,5/2,3)      | (3/2,2,5/2)   | (3/2,2,5/2)                 | (3/2,2,5/2)       | (3/2,2,5/2)              |
| Safety culture                   | (1/3,2/5,1/2)          | (1,1,1)        | (2/5,1/2,2/3) | (3/2,2,5/2)                 | (3/2,2,5/2)       | (1,3/2,2)                |
| Training                         | (2/5,1/2,2/3)          | (3/2,2,5/2)    | (1,1,1)       | (3/2,2,5/2)                 | (3/2,2,5/2)       | (3/2,2,5/2)              |
| Communication between staff      | (2/5,1/2,2/3)          | (2/5,1/2,2/3)  | (2/5,1/2,2/3) | (1,1,1)                     | (1/3,2/5,1/2)     | (2/5,1/2,2/3)            |
| Supervising staff                | (2/5,1/2,2/3)          | (2/5,1/2,2/3)  | (2/5,1/2,2/3) | (2,5/2,3)                   | (1,1,1)           | (1,3/2,2)                |
| Error Management Culture         | (2/5,1/2,2/3)          | (1/2,2/3,1)    | (2/5,1/2,2/3) | (3/2,2,5/2)                 | (1/2,2/3,1)       | (1,1,1)                  |

| <b>E<sub>9</sub></b> |               |               |               |                 |                              |  |
|----------------------|---------------|---------------|---------------|-----------------|------------------------------|--|
| <b>Personal</b>      | Knowledge     | Experience    | Fatigue       | Physical health | Task Time (Circadian Rhythm) |  |
| Knowledge            | (1,1,1)       | (2/5,1/2,2/3) | (2/5,1/2,2/3) | (2,5/2,3)       | (1,1,1)                      |  |
| Experience           | (3/2,2,5/2)   | (1,1,1)       | (2,5/2,3)     | (3/2,2,5/2)     | (3/2,2,5/2)                  |  |
| Fatigue              | (3/2,2,5/2)   | (1/3,2/5,1/2) | (1,1,1)       | (3/2,2,5/2)     | (3/2,2,5/2)                  |  |
| Physical health      | (1/3,2/5,1/2) | (2/5,1/2,2/3) | (2/5,1/2,2/3) | (1,1,1)         | (2/5,1/2,2/3)                |  |

|                                  |                        |                |                          |                             |                                  |                          |
|----------------------------------|------------------------|----------------|--------------------------|-----------------------------|----------------------------------|--------------------------|
| Task Time (Circadian Rhythm)     | (1,1,1)                | (2/5,1/2,2/3)  | (2/5,1/2,2/3)            | (3/2,2,5/2)                 | (1,1,1)                          |                          |
| <b>Job</b>                       | Workload               | Procedures     | The physical environment | Housekeeping                | Transparency of responsibilities | Time available           |
| Workload                         | (1,1,1)                | (2,5/2,3)      | (2,5/2,3)                | (2,5/2,3)                   | (3/2,2,5/2)                      | (3/2,2,5/2)              |
| Procedures                       | (1/3,2/5,1/2)          | (1,1,1)        | (1/2,2/3,1)              | (1/2,2/3,1)                 | (2/5,1/2,2/3)                    | (1/3,2/5,1/2)            |
| The physical environment         | (1/3,2/5,1/2)          | (1,3/2,2)      | (1,1,1)                  | (2/5,1/2,2/3)               | (2/5,1/2,2/3)                    | (1/2,2/3,1)              |
| Housekeeping                     | (1/3,2/5,1/2)          | (1,3/2,2)      | (3/2,2,5/2)              | (1,1,1)                     | (1/2,2/3,1)                      | (1/2,2/3,1)              |
| Transparency of responsibilities | (2/5,1/2,2/3)          | (3/2,2,5/2)    | (3/2,2,5/2)              | (1,3/2,2)                   | (1,1,1)                          | (1,1,1)                  |
| Time available                   | (2/5,1/2,2/3)          | (2,5/2,3)      | (1,3/2,2)                | (1,3/2,2)                   | (1,1,1)                          | (1,1,1)                  |
| <b>Organization</b>              | Patient safety climate | Safety culture | Training                 | Communication between staff | Supervising staff                | Error Management Culture |
| Patient safety climate           | (1,1,1)                | (1,3/2,2)      | (3/2,2,5/2)              | (2,5/2,3)                   | (1,1,1)                          | (2,5/2,3)                |
| Safety culture                   | (1/2,2/3,1)            | (1,1,1)        | (1/2,2/3,1)              | (1,3/2,2)                   | (2/5,1/2,2/3)                    | (1,1,1)                  |
| Training                         | (2/5,1/2,2/3)          | (1,3/2,2)      | (1,1,1)                  | (1,3/2,2)                   | (3/2,2,5/2)                      | (1,3/2,2)                |
| Communication between staff      | (1/3,2/5,1/2)          | (1/2,2/3,1)    | (1/2,2/3,1)              | (1,1,1)                     | (2/5,1/2,2/3)                    | (3/2,2,5/2)              |
| Supervising staff                | (1,1,1)                | (3/2,2,5/2)    | (2/5,1/2,2/3)            | (3/2,2,5/2)                 | (1,1,1)                          | (1,1,1)                  |
| Error Management Culture         | (1/3,2/5,1/2)          | (1,1,1)        | (1/2,2/3,1)              | (2/5,1/2,2/3)               | (1,1,1)                          | (1,1,1)                  |

|                       |           |               |               |                 |                              |  |
|-----------------------|-----------|---------------|---------------|-----------------|------------------------------|--|
| <b>E<sub>10</sub></b> |           |               |               |                 |                              |  |
| <b>Personal</b>       | Knowledge | Experience    | Fatigue       | Physical health | Task Time (Circadian Rhythm) |  |
| Knowledge             | (1,1,1)   | (2/5,1/2,2/3) | (2/5,1/2,2/3) | (1,3/2,2)       | (1,1,1)                      |  |

|                                  |                        |                |                          |                             |                                  |                          |
|----------------------------------|------------------------|----------------|--------------------------|-----------------------------|----------------------------------|--------------------------|
| Experience                       | (3/2,2,5/2)            | (1,1,1)        | (1/3,2/5,1/2)            | (3/2,2,5/2)                 | (1,3/2,2)                        |                          |
| Fatigue                          | (3/2,2,5/2)            | (2,5/2,3)      | (1,1,1)                  | (2,5/2,3)                   | (2,5/2,3)                        |                          |
| Physical health                  | (1/2,2/3,1)            | (2/5,1/2,2/3)  | (1/3,2/5,1/2)            | (1,1,1)                     | (2,5/2,3)                        |                          |
| Task Time (Circadian Rhythm)     | (1,1,1)                | (1/2,2/3,1)    | (1/3,2/5,1/2)            | (1/3,2/5,1/2)               | (1,1,1)                          |                          |
| <b>Job</b>                       | Workload               | Procedures     | The physical environment | Housekeeping                | Transparency of responsibilities | Time available           |
| Workload                         | (1,1,1)                | (2,5/2,3)      | (2,5/2,3)                | (2,5/2,3)                   | (2,5/2,3)                        | (3/2,2,5/2)              |
| Procedures                       | (1/3,2/5,1/2)          | (1,1,1)        | (3/2,2,5/2)              | (3/2,2,5/2)                 | (3/2,2,5/2)                      | (1,3/2,2)                |
| The physical environment         | (1/3,2/5,1/2)          | (2/5,1/2,2/3)  | (1,1,1)                  | (1,1,1)                     | (1/2,2/3,1)                      | (1/2,2/3,1)              |
| Housekeeping                     | (1/3,2/5,1/2)          | (2/5,1/2,2/3)  | (1,1,1)                  | (1,1,1)                     | (1,3/2,2)                        | (3/2,2,5/2)              |
| Transparency of responsibilities | (1/3,2/5,1/2)          | (2/5,1/2,2/3)  | (1,3/2,2)                | (1/2,2/3,1)                 | (1,1,1)                          | (3/2,2,5/2)              |
| Time available                   | (2/5,1/2,2/3)          | (1/2,2/3,1)    | (1,3/2,2)                | (2/5,1/2,2/3)               | (2/5,1/2,2/3)                    | (1,1,1)                  |
| <b>Organization</b>              | Patient safety climate | Safety culture | Training                 | Communication between staff | Supervising staff                | Error Management Culture |
| Patient safety climate           | (1,1,1)                | (1,3/2,2)      | (3/2,2,5/2)              | (3/2,2,5/2)                 | (3/2,2,5/2)                      | (1,1,1)                  |
| Safety culture                   | (1/2,2/3,1)            | (1,1,1)        | (1/2,2/3,1)              | (1,3/2,2)                   | (2/5,1/2,2/3)                    | (1,3/2,2)                |
| Training                         | (2/5,1/2,2/3)          | (1,3/2,2)      | (1,1,1)                  | (3/2,2,5/2)                 | (3/2,2,5/2)                      | (3/2,2,5/2)              |
| Communication between staff      | (2/5,1/2,2/3)          | (1/2,2/3,1)    | (2/5,1/2,2/3)            | (1,1,1)                     | (1/3,2/5,1/2)                    | (2/5,1/2,2/3)            |
| Supervising staff                | (2/5,1/2,2/3)          | (3/2,2,5/2)    | (2/5,1/2,2/3)            | (2,5/2,3)                   | (1,1,1)                          | (2,5/2,3)                |
| Error Management Culture         | (1,1,1)                | (1/2,2/3,1)    | (2/5,1/2,2/3)            | (3/2,2,5/2)                 | (1/3,2/5,1/2)                    | (1,1,1)                  |

### Rating of subPSFs

| Personal factors |           |            |         |                 |                              |
|------------------|-----------|------------|---------|-----------------|------------------------------|
| Task/Subtask     | Knowledge | Experience | Fatigue | Physical health | Task Time (Circadian Rhythm) |
| 1.1              | 8         | 9          | 2       | 8               | 3                            |
| 1.2              | 8         | 9          | 2       | 8               | 3                            |
| 1.3              | 8         | 9          | 2       | 8               | 3                            |
| 1.4              | 8         | 9          | 2       | 8               | 8                            |
| 2.1              | 8         | 9          | 2       | 8               | 5                            |
| 2.2              | 8         | 9          | 2       | 8               | 6                            |
| 2.3              | 8         | 9          | 2       | 8               | 4                            |
| 2.4              | 8         | 9          | 2       | 8               | 4                            |
| 2.5              | 8         | 9          | 2       | 8               | 7                            |
| 2.6              | 8         | 9          | 2       | 8               | 3                            |
| 2.7              | 8         | 9          | 2       | 8               | 5                            |
| 3.1              | 8         | 9          | 2       | 8               | 9                            |
| 3.2              | 8         | 9          | 2       | 8               | 9                            |
| 3.3              | 8         | 9          | 2       | 8               | 6                            |
| 3.4              | 8         | 9          | 2       | 8               | 7                            |
| 3.5              | 8         | 9          | 2       | 8               | 7                            |
| 3.6              | 8         | 9          | 2       | 8               | 7                            |
| 3.7              | 8         | 9          | 2       | 8               | 8                            |
| 4.1              | 8         | 9          | 2       | 8               | 8                            |
| 4.2              | 8         | 9          | 2       | 8               | 6                            |
| 4.3              | 8         | 9          | 2       | 8               | 8                            |
| 4.4              | 8         | 9          | 2       | 8               | 8                            |
| 4.5              | 8         | 9          | 2       | 8               | 6                            |
| 4.6              | 8         | 9          | 2       | 8               | 5                            |
| 4.7              | 8         | 9          | 2       | 8               | 8                            |
| 5.1              | 8         | 9          | 2       | 8               | 5                            |
| 5.2              | 8         | 9          | 2       | 8               | 5                            |
| 5.3              | 8         | 9          | 2       | 8               | 5                            |
| 5.4              | 8         | 9          | 2       | 8               | 5                            |
| 5.5              | 8         | 9          | 2       | 8               | 5                            |
| 5.6              | 8         | 9          | 2       | 8               | 7                            |

| Job-related factors |          |            |                          |              |                                  |                |
|---------------------|----------|------------|--------------------------|--------------|----------------------------------|----------------|
| Task/Subtask        | Workload | Procedures | The physical environment | Housekeeping | Transparency of responsibilities | Time available |
| 1.1                 | 2        | 7          | 4                        | 7            | 7                                | 4              |
| 1.2                 | 2        | 7          | 4                        | 7            | 7                                | 4              |
| 1.3                 | 2        | 7          | 4                        | 7            | 7                                | 4              |

|     |   |   |   |   |   |   |
|-----|---|---|---|---|---|---|
| 1.4 | 2 | 7 | 4 | 7 | 7 | 4 |
| 2.1 | 5 | 3 | 4 | 8 | 7 | 4 |
| 2.2 | 2 | 3 | 4 | 8 | 7 | 4 |
| 2.3 | 2 | 3 | 4 | 8 | 7 | 4 |
| 2.4 | 2 | 3 | 4 | 8 | 7 | 4 |
| 2.5 | 2 | 3 | 4 | 8 | 7 | 4 |
| 2.6 | 2 | 5 | 4 | 8 | 7 | 4 |
| 2.7 | 2 | 5 | 4 | 8 | 7 | 4 |
| 3.1 | 5 | 3 | 6 | 6 | 7 | 4 |
| 3.2 | 5 | 3 | 6 | 6 | 7 | 4 |
| 3.3 | 2 | 3 | 6 | 7 | 7 | 4 |
| 3.4 | 2 | 3 | 6 | 7 | 7 | 4 |
| 3.5 | 2 | 4 | 6 | 7 | 7 | 4 |
| 3.6 | 2 | 3 | 6 | 6 | 7 | 4 |
| 3.7 | 2 | 3 | 6 | 9 | 7 | 4 |
| 4.1 | 2 | 3 | 6 | 9 | 8 | 4 |
| 4.2 | 2 | 3 | 6 | 9 | 8 | 4 |
| 4.3 | 2 | 3 | 6 | 9 | 8 | 4 |
| 4.4 | 2 | 3 | 6 | 9 | 8 | 4 |
| 4.5 | 2 | 3 | 6 | 9 | 8 | 4 |
| 4.6 | 2 | 3 | 6 | 9 | 8 | 4 |
| 4.7 | 2 | 3 | 6 | 4 | 8 | 4 |
| 5.1 | 2 | 3 | 5 | 4 | 8 | 4 |
| 5.2 | 2 | 3 | 5 | 5 | 8 | 4 |
| 5.3 | 2 | 3 | 5 | 5 | 8 | 4 |
| 5.4 | 2 | 4 | 5 | 5 | 8 | 4 |
| 5.5 | 2 | 5 | 5 | 5 | 8 | 4 |
| 5.6 | 2 | 3 | 5 | 5 | 8 | 4 |

| Organization-related factors |                        |                |          |                             |                   |                          |
|------------------------------|------------------------|----------------|----------|-----------------------------|-------------------|--------------------------|
| Task/Subtask                 | Patient safety climate | Safety culture | Training | Communication between staff | Supervising staff | Error Management Culture |
| 1.1                          | 2                      | 5              | 5        | 8                           | 1                 | 1                        |
| 1.2                          | 5                      | 5              | 6        | 6                           | 1                 | 1                        |
| 1.3                          | 4                      | 5              | 6        | 5                           | 1                 | 1                        |
| 1.4                          | 6                      | 5              | 6        | 7                           | 1                 | 1                        |
| 2.1                          | 7                      | 7              | 2        | 4                           | 1                 | 1                        |
| 2.2                          | 6                      | 5              | 2        | 5                           | 1                 | 1                        |
| 2.3                          | 8                      | 6              | 2        | 6                           | 1                 | 1                        |
| 2.4                          | 5                      | 4              | 2        | 4                           | 1                 | 1                        |
| 2.5                          | 5                      | 5              | 2        | 4                           | 1                 | 1                        |
| 2.6                          | 5                      | 4              | 2        | 5                           | 1                 | 1                        |
| 2.7                          | 5                      | 6              | 2        | 7                           | 1                 | 1                        |
| 3.1                          | 5                      | 6              | 6        | 8                           | 1                 | 1                        |
| 3.2                          | 5                      | 6              | 6        | 8                           | 1                 | 1                        |
| 3.3                          | 5                      | 3              | 5        | 8                           | 1                 | 1                        |
| 3.4                          | 5                      | 5              | 6        | 8                           | 1                 | 1                        |
| 3.5                          | 5                      | 5              | 6        | 5                           | 1                 | 1                        |
| 3.6                          | 5                      | 6              | 6        | 8                           | 1                 | 1                        |
| 3.7                          | 5                      | 5              | 5        | 8                           | 1                 | 1                        |
| 4.1                          | 5                      | 4              | 6        | 8                           | 1                 | 1                        |

|     |   |   |   |   |   |   |
|-----|---|---|---|---|---|---|
| 4.2 | 5 | 6 | 6 | 5 | 1 | 1 |
| 4.3 | 5 | 7 | 7 | 8 | 1 | 1 |
| 4.4 | 5 | 6 | 7 | 8 | 1 | 1 |
| 4.5 | 5 | 4 | 6 | 4 | 1 | 1 |
| 4.6 | 5 | 7 | 6 | 8 | 1 | 1 |
| 4.7 | 5 | 7 | 6 | 8 | 1 | 1 |
| 5.1 | 5 | 5 | 6 | 7 | 1 | 1 |
| 5.2 | 5 | 4 | 6 | 6 | 1 | 1 |
| 5.3 | 6 | 4 | 6 | 5 | 1 | 1 |
| 5.4 | 5 | 7 | 6 | 8 | 1 | 1 |
| 5.5 | 5 | 6 | 6 | 8 | 1 | 1 |
| 5.6 | 5 | 3 | 3 | 8 | 1 | 1 |
